# Supplementary material
Source: PubMed Central journal article supplement (PMC3592066)
Supplement: JCM.02974-12_zjm999092317so1.pdf [file JCM.02974-12_zjm999092317so1.pdf]

Table S1. Primer sequences

| PANEL 1 ; 12 PLEX; 25 SEROTYPES |                                                      |
|---------------------------------|------------------------------------------------------|
| SEROTYPE(S)                     | PRIMER SEQUENCE (5'-3')                              |
| 22A,22F                         | ATAGGACGTTTCTCAATCCCATAA<br>ATCCCTCCCCCTATAACAAATAGA |
| 20                              | AATCATGCCAATACTTCTACTCC<br>CTCAAAGATTGTGTGGTACGGTAG  |
| 33A,33F, 37                     | TGGGATAATAAATCTGGAAGTGGT<br>TATCCCTCCTTGAGCTAAAACAAC |
| 23F                             | TCGAGTGTTAGGTGTTGTGAATTT<br>ACCAACTAACCCAACATAACCATT |
| 19A, 11A                        | ATGACTTTGGGTTAGTCGGTATGT<br>TTCCAATAGAAGAAAGCCATTAGG |
| 19F                             | TACTGAGGTTAAGATTGCTGATCG<br>AAGCAGATACGTCAATAACACGAA |
| 17F                             | TACAAAGCCTGTAAACAGCAAGAG<br>GTTTGTGACGTTTTCGTACATTTT |
| 14                              | GTTAGACTGGGACGGATTTACATT<br>ACCAAAACCTCTAGAAGAAAAGCA |
| 11A,11D,11E,11F, 42             | ATTCTGAAAAGAGGAAGGAAGAT<br>AAACCATATCCAAACCATTTCACT  |
| 10A,10B,10C,10F                 | GAATGAGATTTTGTATGGCAGTTG<br>TCAGATTTGCTAACCATGGAECTA |
| 9N,9L                           | TCGTTAATTCAGCACACAATACCT<br>GTGGCCAATATACACAAAGAACAA |
| 9A,9V                           | CTCCGCACACAATACCTTACTAGA<br>TTCTCCTCTCCAAAAGACCAATAC |

| PANEL 2 ; 9 PLEX; 16 SEROTYPES |                                                      |
|--------------------------------|------------------------------------------------------|
| SEROTYPE(S)                    | PRIMER SEQUENCE (5'-3')                              |
| 1                              | ATCAAACCTGGTTTATGGACACCT<br>GTTAGCAAATCAGCACGAGTAGA  |
| 2                              | TAAAATTACCCAAAAGCTATCCA<br>TGCAGTTAAATGGATACAAACGAT  |
| 3                              | CAACTCGCGTACGTTATTTTAATG<br>CACCACAGCTGTAATCAGATTTTC |
| 4                              | GTACAATGCGGGTAGGATTTTAAC<br>AGTACGCTTTATAACTCGGGACAG |

|                   |                                                      |
|-------------------|------------------------------------------------------|
| 5                 | GTTTTAGGCTACTGGAATGCTGAT<br>AACTGCCGATAAAAAGATAGATGC |
| 6A,6B,6C          | TCACTCGCTCTCTGTTTRCATTTC<br>TTCTGCACCTAGTTCTTTGTTACG |
| 7A, 7F            | GTCGCTTTGGCAATCTCAAT<br>ATTTCCGCCTCTCCTAAACC         |
| 8                 | TAAATTAGCTGCATACGCAAGAAC<br>TACCGCATACATAGACCAAGCTAA |
| 12A,12B,12F,44,46 | TGAATATGGACGGTGGAG<br>AGCAAAGAAAGCCGAAAG             |

| PANEL 3 ; 12 PLEX; 15 SEROTYPES |                                                      |
|---------------------------------|------------------------------------------------------|
| SEROTYPE(S)                     | PRIMER SEQUENCE (5'-3')                              |
| 11B,11C                         | TGCTCAATTGTCTATATGCTGATG<br>TGATAGCGGCCATTAAGTAAA    |
| 13                              | AGCACTCCAAGTCGTAATCTACC<br>TTTAACTGATACGAGGGCAGTATTC |
| 15A,15F                         | TGCTATATTTGGGAAAGGACTAGG<br>CACCACAAAAGCTATGATGGATAC |
| 17A                             | CAAAGAATTTGTTGGTCTAGGT<br>TCCACTCAACTTTACTGCATTGAT   |
| 19B,19C                         | TAAGAGAATTCGGAGATTTGTGGT<br>GAAACCAGTAGCACTCTTGCTGA  |
| 21                              | TGCTTCTAGGTCACAATTATTGG<br>GCACCATAATCGCTATTTGATACA  |
| 27                              | TAATGATTGCAGCGATGTTTTACT<br>CAGCTGATAAGCATAAGGAGCATA |
| 29                              | CCATTGAAGGAGTCAGGAATTATC<br>ATAAAAGCAATGACCCACTGATCT |
| 31                              | GGTTTGAAAATCCCTTAGTGACAT<br>AACAGAACAACAACGCGATACTAA |
| 36                              | TCTTGGGGATCTCCATTTTTAGTA<br>AATCAATAACAGCCTCCGTTTTAC |
| 39                              | ACCATACAACATTTGTTTTGAGA<br>CGAAATGGCAACTAAAGGATAAAC  |
| 23A                             | AAGTAAAGCAGCGTTTTTAAGCAT<br>GAGGGGAGTACTTAACGCACTAAA |

| PANEL 4; 12PLEX; 27 SEROTYPES |                                                      |
|-------------------------------|------------------------------------------------------|
| SEROTYPE(S)                   | PRIMER SEQUENCE (5'-3')                              |
| 24A,24B,24F                   | GCAGCAGAAATAGTACGAAGGAAT<br>CTGGGTATTGTAATGTGGTTTTCA |
| 28A,28F                       | CAGGAACATTGATATTAGCAGGTG<br>TCCTCCTCCTAAAATTTGCTCTAA |
| 25A,25F,38                    | TGGAGTATAATGGCTGCTTTAACA<br>GGCTGCAATATATGATTTTCCTCT |
| 33B,33C,33D                   | AATCTCCTATTTGGGGGYAATAC<br>TCAATGTGACAGGGAGAAGTAAGA  |
| 35A,35C,42                    | TTAATGCCTGTTTGAGTTACTGGA<br>TCCAATCAATCTTTTGACCTAACA |
| 34, 35F                       | ATGACTGGTAGTAGAGGGTCCTTG<br>ATAATCCCATCTTGACCTACTCCA |
| 41A,41F                       | TGCGTATATATTGGTATCGATTGG<br>TAGCGAGAACTATCTGCATCTTG  |
| 43                            | TGGAATTGTCTCATTAGTTCAAGG<br>TACGGTGTAACCATAGCTCTCAAA |
| 45                            | GCAAGATATGCTGTAGGGAAAAGT<br>AGCAACAAAATAGAAACATGCTGA |
| 47A                           | TTTTCGAACTGGAGGGTTAGTAAG<br>GTTCTAGAGTCCGTTATGGCAAAT |
| 48                            | AATGTGGATTCCAAGTGTTCCTAT<br>CGGCTAAGATCTGAAAGGTATGTT |
| 7C,7B,40,24B,24F              | ATTTTGGGACTGTGGATGATTACT<br>TGACGTTGAAAGGCTAAAGCATA  |

| PANEL 5 ; 8 PLEX; 14 SEROTYPES |                                                     |
|--------------------------------|-----------------------------------------------------|
| SEROTYPE(S)                    | PRIMER SEQUENCE (5'-3')                             |
| 35B                            | TGCGCAAGGAGAACGAAGT<br>TCGTCAATCAAAGCATGGAA         |
| 23B                            | AATGGTGGGTTGACGCATAA<br>CCGCTATGAACAACGATCCA        |
| 47F,35F                        | GGCGCAAATTGGGAGTTAT<br>TCGAGAATCCGTTTCATCATACA      |
| 32A, 32F                       | TCATGGTTTTTGCAGGGTCT<br>CAAGCAGTGTTGATGCGTTC        |
| 18A,18B,18C,18F                | CGAACCATTGAAACTATCATCTG<br>AATTGTTCTTTTCTGTAICTAGTC |

|          |                                                      |
|----------|------------------------------------------------------|
| 15B, 15C | AATTTTACTTGGAGCAGGAATCAG<br>AGCCAAAACACCAATAAAGCTAAA |
| 16F      | TCTGCTCCTAATTTAGCTGGAGTT<br>ATTAAGGGGAAGATTACCAAGGTC |
| 16A      | GGTAACGCCTCCTTTGTAGCA<br>CAACTCCAATCTGGCAGAACA       |
