# Supplementary material
Source: PubMed Central journal article supplement (PMC3592066)
Supplement: JCM.02974-12_zjm999092317so2.pdf [file JCM.02974-12_zjm999092317so2.pdf]

Table S2. Real-time PCR Ct values

| Sample | Serotype (Ct value) |                |            |            |
|--------|---------------------|----------------|------------|------------|
| L1     | 14 (24.0)           | 19F (22.0)     |            |            |
| L2     | 14 (19.9)           | 19A(29.0)      | 5 (31.0)   | 6 (31.0)   |
| L4     | 1 (27.8)            | 9A/V (25.3)    | 19F (26.0) |            |
| L5     | 1 (24.0)            | 6 (28.0)       | 23F (25.1) | 19F (28.5) |
| L7     | 5 (23.5)            | 14 (24.0)      |            |            |
| L8     | 14 (19.0)           | 9A/V (31.0)    |            |            |
| L9     | 1 (35.0)            | 6 (36)         | 19F (22)   |            |
| L11    | 1 (31.3)            | 15A/F (32.0)   |            |            |
| L13    | 5 (35.0)            | 6 (38.5)       |            |            |
| L14    | 14 (21.7)           | 15A/15F (32.5) |            |            |
| L17    | 14 (21.6)           | 13 (26.0)      |            |            |
| L20    | 9A/V (24.1)         | 5 (29.0)       | 14 (26.7)  |            |
| L24    | 5 (22.2)            | 9A/V (26.5)    |            |            |
